# Supplementary material for: Evaluation of location tracking methods to understand human-wildlife contact and pathogen spillover risks
Source: Research Square preprint supplement (doi:10.21203/rs.3.rs-7209357/v1), 2025-08-06
Supplement: Supplementary file 2 [file 93a6fd992a4dbc71f247461b.docx]

# Additional File 1: Supplementary Figures & Tables


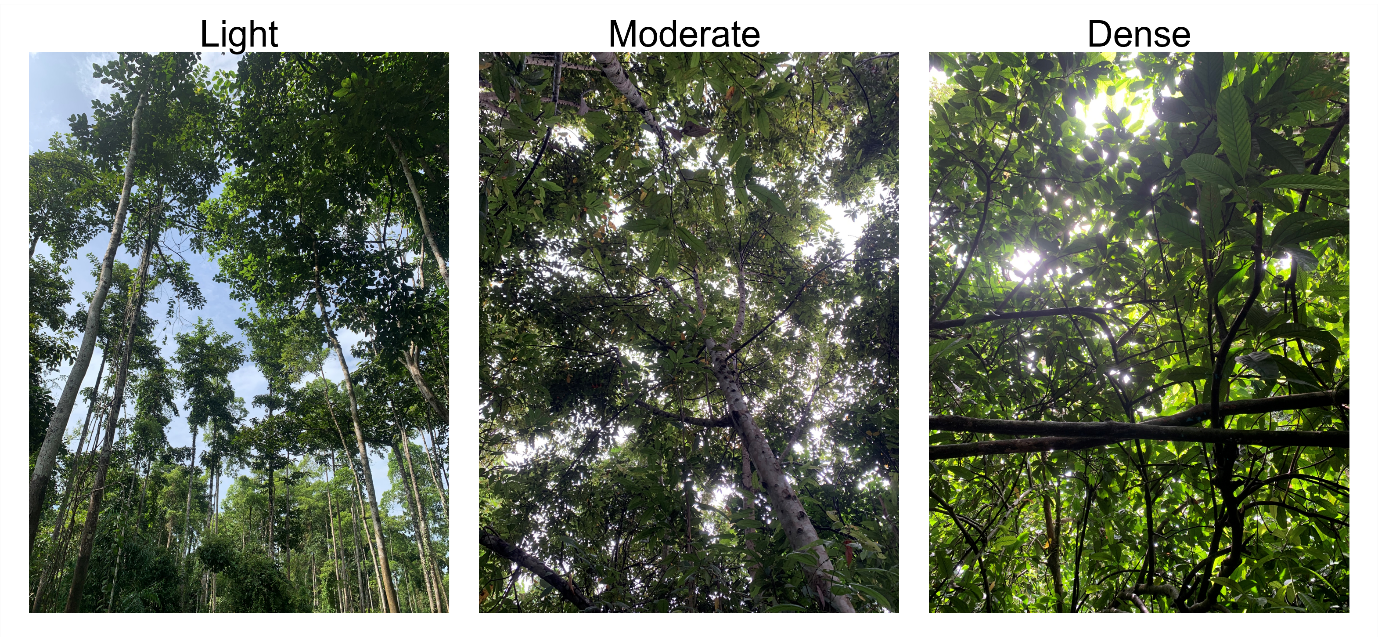


Figure A1. Varying canopy cover at test site in Sabah, Malaysia.


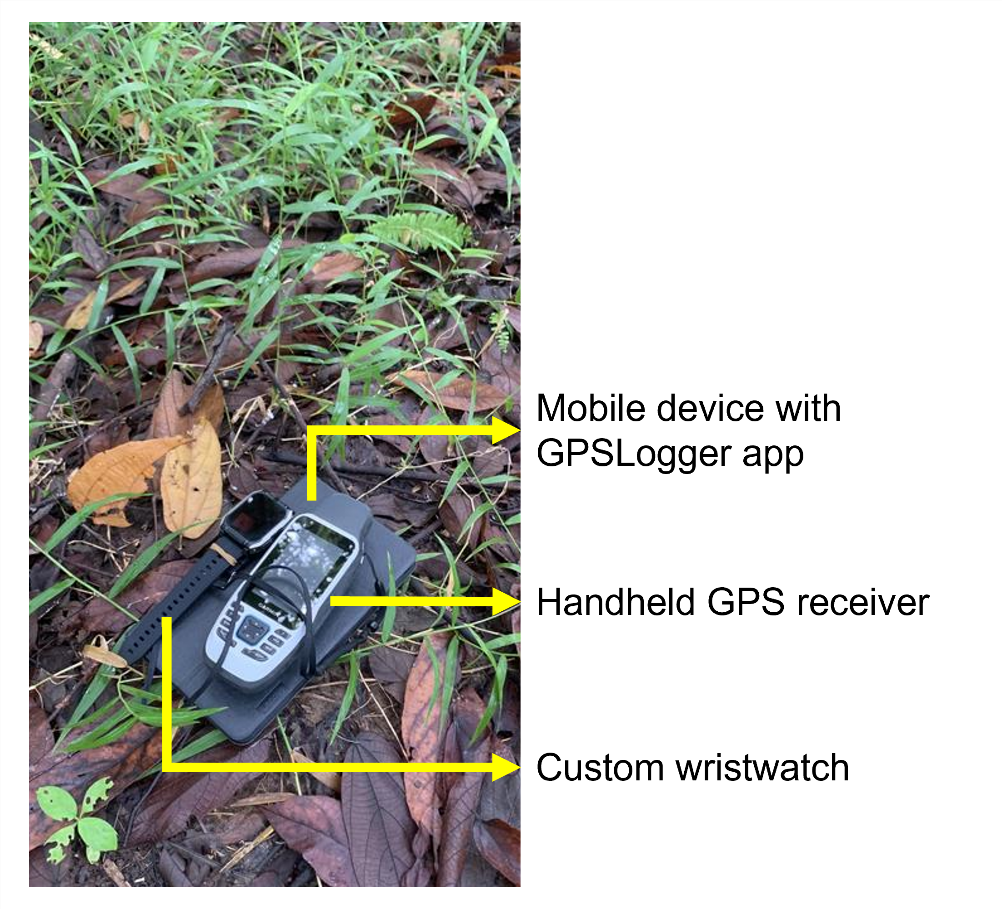


Figure A2. Experimental setup of three location tracking devices.


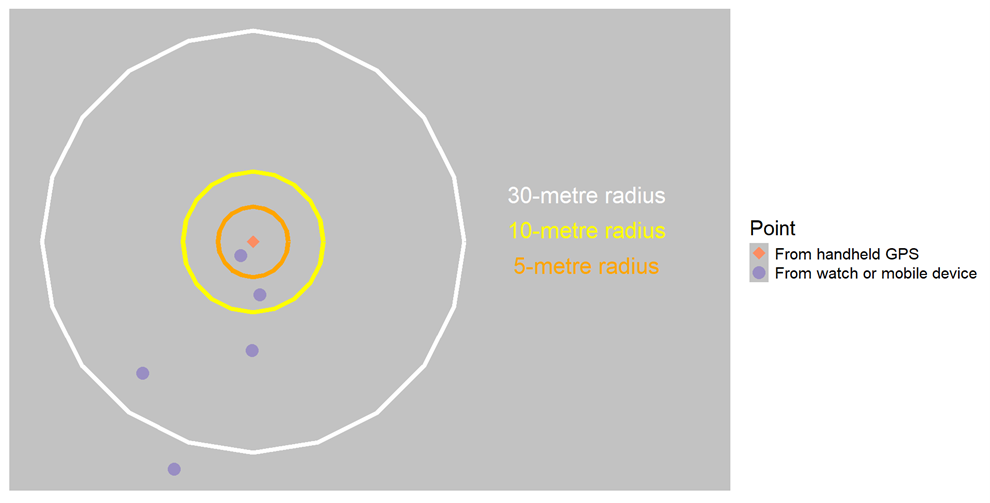


Figure A3. Points within a distance to reference. 5 metres: 1/5. 10 metres: 2/5. 30 metres: 4/5.


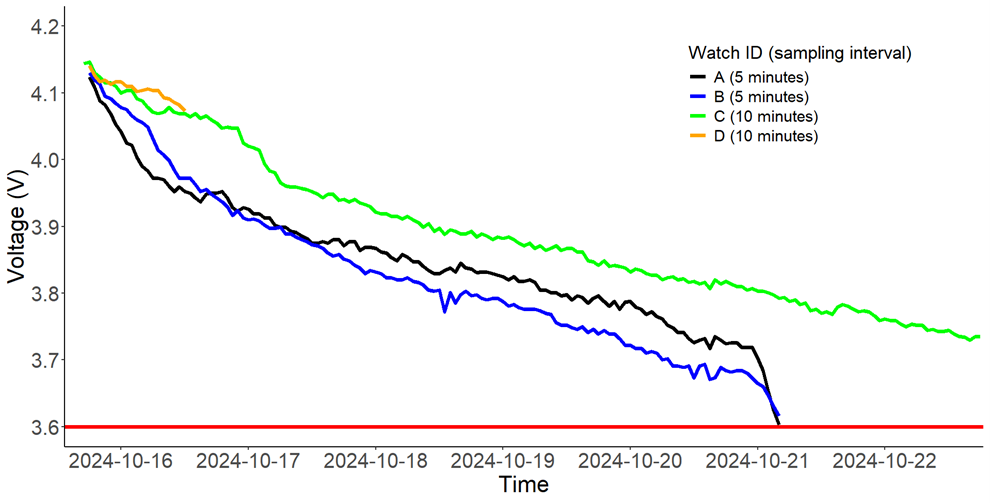


Figure A4. Battery voltage over time during pilot study in Guinea. Red line is 3.6-Volts threshold.


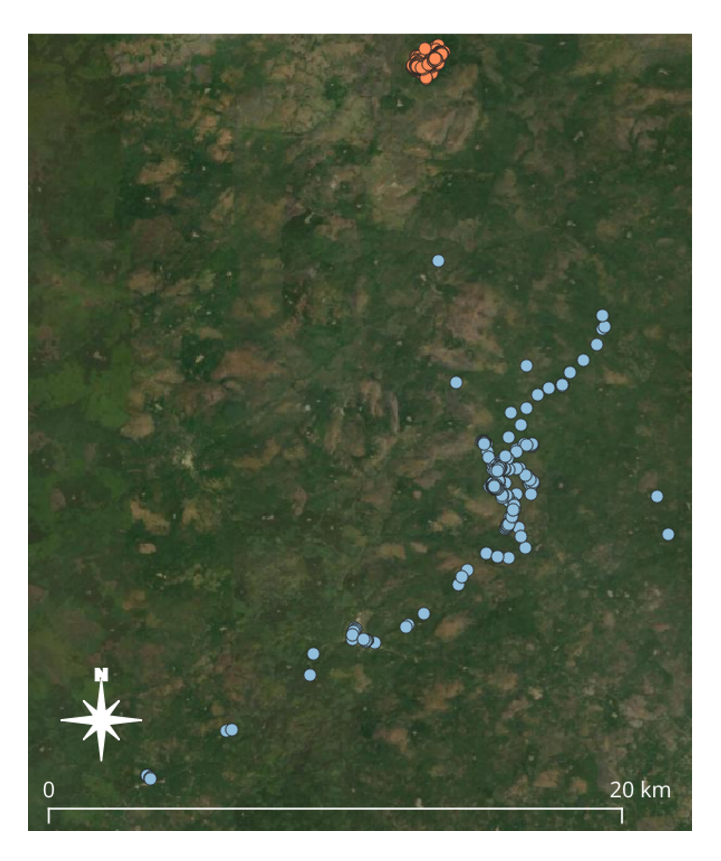


Figure A5. Tracks of a participant with low (red) and high (blue) activity, collected from mobile devices.

Table A1. Proportion of sampled watch and mobile device points within a distance to reference point.

|  | Type of Canopy Cover | Within 5 metres  (%) | Within 10 metres (%) | Within 30 metres (%) |
| --- | --- | --- | --- | --- |
| Watch | Light | 8.3 | 58.3 | 100.0 |
| Moderate | 6.7 | 40.0 | 80.0 |
| Dense | 13.6 | 31.8 | 86.4 |
| Overall | 10.2 | 40.1 | 87.8 |
| Mobile device | Light | 22.0 | 76.0 | 98.0 |
| Moderate | 1.8 | 12.7 | 41.8 |
| Dense | 5.1 | 11.5 | 42.3 |
| Overall | 8.7 | 29.5 | 57.4 |
